# Supplementary material
Source: PubMed Central journal article supplement (PMC558459)
Supplement: bmj_330_7506_1486__1.pdf [file bmj_330_7506_1486__1.pdf]

**1) General methods used for the HES based indicators:** The Local Authority (LA) of residence for each CIPS across all financial years was recoded, using postcode lookup files, to the latest boundaries as at April 2003. LA data were aggregated to create values for Strategic Health Authorities (SHAs), for sub-national geographical comparisons. For details on the construction of CIPS and explanation of statistical methods see [http://ratings2004.healthcarecommission.org.uk/more\\_information.asp](http://ratings2004.healthcarecommission.org.uk/more_information.asp) (accessed 8/11/04). The fields used for each HES based indicator are shown in Table 1.1.

**Table 1.1 Fields used for the Hospital Episode Statistics (HES) based indicators**

| <b>Indicator</b>                                                                            | <b>Episode Selection</b>                       | <b>Startage</b> | <b>Sex</b> | <b>Newhnsno &amp; Pasladdst</b> | <b>Admimeth</b> | <b>Admidate</b> | <b>Admisorc</b> | <b>Disdate</b> | <b>Dismeth</b> | <b>Disdest</b> | <b>Epistart</b> | <b>Epiend</b> | <b>Epiorder</b> | <b>Oper_1-12</b> | <b>Diag_1</b> | <b>Mainspef</b> |
|---------------------------------------------------------------------------------------------|------------------------------------------------|-----------------|------------|---------------------------------|-----------------|-----------------|-----------------|----------------|----------------|----------------|-----------------|---------------|-----------------|------------------|---------------|-----------------|
| <b>Hospital case-fatality (general)</b>                                                     | classpat = 1,2,5, epitype = 1,2, epistat = '3' | √               | √          | √                               | √               | √               | √               | √              | √              | √              | √               | √             | √               |                  | √             |                 |
| <b>Patterns of mental health care</b>                                                       | classpat = 1,2,5, epitype =1,2                 | √               | √          | √                               | √               | √               | √               | √              | √              | √              | √               | √             | √               |                  | √             | √               |
| <b>Population emergency admission rates (acute conditions, chronic conditions, stroke)</b>  | classpat = 1,2,5 epitype = 1,2                 | √               | √          | √                               | √               | √               | √               | √              | √              | √              | √               | √             | √               |                  | √             |                 |
| <b>Timely discharge to usual place of residence following hospital treatment for stroke</b> | classpat = 1, epitype = 1, epistat = 3         | √               | √          | √                               | √               | √               | √               | √              | √              | √              | √               | √             | √               |                  | √             |                 |
| <b>Hospital case-fatality (stroke)</b>                                                      | classpat = 1, epitype = 1,                     | √               | √          | √                               | √               | √               | √               | √              | √              | √              | √               | √             | √               |                  | √             |                 |

|                                                                               |                                      |   |   |   |   |   |   |   |   |   |   |   |   |   |   |   |   |
|-------------------------------------------------------------------------------|--------------------------------------|---|---|---|---|---|---|---|---|---|---|---|---|---|---|---|---|
|                                                                               | epistat =<br>3                       |   |   |   |   |   |   |   |   |   |   |   |   |   |   |   |   |
| <b>Emergency readmission following discharge after treatment for a stroke</b> | <b>classpat = 1,5, epitype = 1,2</b> | √ | √ | √ | √ | √ | √ | √ | √ | √ | √ | √ | √ | √ | √ | √ | √ |

| <b>Table 1.2: Completeness and quality of HES data</b>                                                                   |                        |                        |                        |                        |                        |
|--------------------------------------------------------------------------------------------------------------------------|------------------------|------------------------|------------------------|------------------------|------------------------|
|                                                                                                                          | <b>1998-9</b>          | <b>1999-2000</b>       | <b>2000-1</b>          | <b>2001-2</b>          | <b>2002-3</b>          |
|                                                                                                                          | England<br>(SHA range) |
| <i>Total finished (FCE) and unfinished (UCE) consultant episodes available for analysis after removal of duplicates*</i> | 12,045,341             | 12,693,195             | 12,874,260             | 12,925,980             | 13,427,090             |
| <i>Total FCE available for analysis after removal of duplicates†</i>                                                     | 11,957,741             | 12,171,572             | 12,248,570             | 12,297,667             | 12,692,451             |
| <i>Independent count of hospital activity(FCE) submitted by NHS Trusts</i>                                               |                        | Change to new system   | 11,839,859             | 11,771,317             | 12,632,619             |
| <i>Surplus records submitted to HES</i>                                                                                  |                        |                        | 408,711                | 526,350                | 59,832                 |
| <i>Number of continuous</i>                                                                                              | 11,047,677             | 11,613,216             | 11,697,424             | 11,635,407             | 12,016,995             |

**Table 1.2: Completeness and quality of HES data**

|                                                                                                                                | <b>1998-9</b>             | <b>1999-2000</b>          | <b>2000-1</b>             | <b>2001-2</b>             | <b>2002-3</b>             |
|--------------------------------------------------------------------------------------------------------------------------------|---------------------------|---------------------------|---------------------------|---------------------------|---------------------------|
|                                                                                                                                | England<br>(SHA<br>range) | England<br>(SHA<br>range) | England<br>(SHA<br>range) | England<br>(SHA<br>range) | England<br>(SHA<br>range) |
| <i>inpatient spells (CIPS)<br/>created from finished and<br/>unfinished episodes</i>                                           |                           |                           |                           |                           |                           |
| <i>Percent FCEs ending in<br/>death in hospital, with<br/>primary diagnosis missing or<br/>invalid</i>                         | 3.3<br>(0.2-10.0)         | 3.2<br>(0.3-12.8)         | 4.6<br>(1.0-21.6)         | 4.1<br>(1.2-12.0)         | 2.6<br>(0.3-6.0)          |
| <i>Percent of all FCEs used for<br/>the hospital case-fatality<br/>indicator with primary<br/>diagnosis missing or invalid</i> | 2.0<br>(0.2-5.0)          | 2.0<br>(0.3-5.9)          | 2.7<br>(0.4-9.6)          | 2.6<br>(0.6-7.1)          | 2.1<br>(0.2-6.1)          |

| <b>Table 1.2: Completeness and quality of HES data</b>                                                                                                                                                                                   |                           |                           |                           |                           |                           |
|------------------------------------------------------------------------------------------------------------------------------------------------------------------------------------------------------------------------------------------|---------------------------|---------------------------|---------------------------|---------------------------|---------------------------|
|                                                                                                                                                                                                                                          | <b>1998-9</b>             | <b>1999-2000</b>          | <b>2000-1</b>             | <b>2001-2</b>             | <b>2002-3</b>             |
|                                                                                                                                                                                                                                          | England<br>(SHA<br>range) | England<br>(SHA<br>range) | England<br>(SHA<br>range) | England<br>(SHA<br>range) | England<br>(SHA<br>range) |
| <i>Percent of all episodes used for the hospital case-fatality indicator with missing or invalid codes in at least one HES field used for the indicator (very similar figures for the stroke admissions and primary care indicators)</i> | 3.2<br>(0.6-7.6)          | 3.1<br>(0.8-8.1)          | 3.6<br>(0.6-10.8)         | 3.5<br>(1.0-9.84)         | 2.9<br>(0.6-8.4)          |
| <i>Percent of all episodes used for the stroke case-fatality and timely discharge indicators with missing or invalid codes in at least one HES field used for the indicator (very similar figures for the readmissions indicator)</i>    | 4.3<br>(0.7-9.4)          | 3.8<br>(1.1-9.8)          | 4.5<br>(0.9-13.2)         | 4.2<br>(1.4-12.1)         | 3.6<br>(0.7-9.3)          |
| <i>Percent of all episodes used for the mental health patterns of care indicator with</i>                                                                                                                                                | 3.4<br>(0.6-7.7)          | 3.2<br>(1.0-8.1)          | 3.9<br>(0.6-10.9)         | 3.6<br>(1.1-9.9)          | 3.0<br>(0.6-8.5)          |

**Table 1.2: Completeness and quality of HES data**

|                                                                                                                                                                                                                                                                                                                                                                                                          | <b>1998-9</b>             | <b>1999-2000</b>          | <b>2000-1</b>             | <b>2001-2</b>             | <b>2002-3</b>             |
|----------------------------------------------------------------------------------------------------------------------------------------------------------------------------------------------------------------------------------------------------------------------------------------------------------------------------------------------------------------------------------------------------------|---------------------------|---------------------------|---------------------------|---------------------------|---------------------------|
|                                                                                                                                                                                                                                                                                                                                                                                                          | England<br>(SHA<br>range) | England<br>(SHA<br>range) | England<br>(SHA<br>range) | England<br>(SHA<br>range) | England<br>(SHA<br>range) |
| <i>missing or invalid codes in at least one HES field used for the indicator</i>                                                                                                                                                                                                                                                                                                                         |                           |                           |                           |                           |                           |
| HES fields used for analyses of these indicators - patient classification, type of episode, status of episode, age on admission, sex of patient, NHS number, Local Authority district, method of admission, date of admission, source of admission, date of discharge, method of discharge, destination on discharge, date episode ended, episode order, diagnoses, operative procedures, main specialty |                           |                           |                           |                           |                           |

\* Includes regular day and night episodes from 1999-2000 onwards.

† Excludes regular day and night episodes for all years.
