# Supplementary material
Source: PubMed Central journal article supplement (PMC558459)
Supplement: bmj_330_7506_1486__5.pdf [file bmj_330_7506_1486__5.pdf]

## ***11) Treated and controlled high blood pressure***

**11.1 Numerator:** The number of persons with a blood pressure reading below 140 mmHg and a diastolic blood pressure (DBP) below 90mmHg but who are currently taking prescribed drugs for blood pressure (normotensive treated, see 10.1).

**11.2 Denominator:** The number of persons aged 16+ in a sample survey of the health of the population of England with high blood pressure (see 10.1).
