# Supplementary material
Source: PubMed Central journal article supplement (PMC558459)
Supplement: bmj_330_7506_1486__9.pdf [file bmj_330_7506_1486__9.pdf]

## ***15) Stroke mortality***

**15.1 Numerator:** Deaths from all cerebrovascular diseases, classified by underlying cause of death (ICD-9 430-438, ICD-10 I60-I69), for all ages registered in the specified calendar year(s). Years 1998 and 2000 use ICD-9, and years 1999, and 2001-2 use ICD-10. Data based on ICD-9 are adjusted for equivalence to ICD-10 using the following ICD-10/9 comparability ratios: males 1.131, females 1.090. Source: DH Mortality Extract 1993-2002, ONS.

**15.2 Denominator:** Mid-year population estimates for all ages for the specified year(s). Source: 1992-2000 revised mid-year population estimates (released 13/02/2003), ONS; 2001 revised mid-year population estimates (released 4/11/2003), ONS; 2002 revised mid-year population estimates (released 27/01/2004), ONS.

Rates are directly age standardised using the European Standard Population. Source: Waterhouse J et al (eds). Cancer incidence in five continents. Lyons: IARC, 1976 (Vol. 3, p456).
