# Supplementary material
Source: PubMed Central journal article supplement (PMC558459)
Supplement: bmj_330_7506_1486__10.pdf [file bmj_330_7506_1486__10.pdf]

## 2) *Hospital case-fatality*

**2.1 Numerator:** The number of denominator continuous inpatient spells (*i.e.* spells excluding those with a diagnosis of cancer anywhere in the spell) where the patient dies in hospital or after discharge between 0-29 days (inclusive) of admission. Individual finished consultant episodes are linked within a financial year with other episodes where all are part of one continuous spell of care for a patient. A spell may contain HES data from another financial year only when one of its episodes spans years. Death registration data from the Office for National Statistics for deaths occurring during the financial year and up to end April of the following financial year are linked, so that deaths within 30 days of admission right up to the end of March during the financial year of analysis may be counted. The indicator includes deaths occurring after transfer to another Trust and also those that occur outside hospital following discharge but between 0-29 days of admission. There is variation in the completeness of hospital records and the quality of coding of diagnoses which may impact on the standardisation process. Also, there may be variation between Trusts in the way that the primary diagnosis is attributed. There may also be variation in the proportion of cases where the admission date is not coded, although this is quite small.

**2.2 Denominator:** The number of continuous inpatient spells (CIPS) which begin with a finished episode, excluding those with a diagnosis of cancer anywhere within a spell. Finished consultant episodes assumed to relate to the same patient are linked to form a CIPS, since the primary diagnosis and death can occur in separate episodes and even in separate hospitals after a transfer. Each CIPS must start with an admission episode, and finish with a discharge episode in the year of analysis. In some cases the admission episode may have commenced in a preceding HES year. CIPS with a diagnosis of cancer (other than benign or *in situ* cancers) *i.e.* ICD 10 codes C00 to C97 and D37 to D48, or mention of chemotherapy for cancer (ICD 10 code Z51.1) anywhere in the spell are excluded.

**2.3 Method of selecting diagnosis groups for use in case-fatality standardisation:** Case-fatality rates for individual diagnoses (at ICD 10 three digit level), adjusted by age and sex, were obtained separately for elective and non-elective admissions for the two financial years (2000-1 and 2001-2). Similarly, rates were obtained at the chapter and sub-chapter level. Within each year and admission type, a proposed listing of single and grouped diagnoses was produced on a hierarchical basis. An individual diagnosis was only included if its case fatality rate was significantly

different from its sub-chapter, and a sub-chapter if its rate was significantly different from its chapter. Diagnoses listed individually were excluded from the sub-chapter to avoid double counting. The list produced for ICD Chapter 1 for non-elective admissions is shown below as an example.

A00-B99 - Chapter 1 - Remainder of chapter

A00-A09 - Rest of Intestinal infectious diseases

A04 - Other bacterial intestinal infections

A20-A49 - Rest of Certain bacterial diseases

A39 - Meningococcal infection

B00-B09 - Viral infections characterized by skin & mucous membrane

For each admission type, the lists produced for the two financial years were compared. Individual diagnoses and sub-chapters were included in the final selection only if they appeared in both years and if the number of deaths in each year was greater than 50.

The resultant groups are shown in Table 2.1.

| <b>Table 2.1: Diagnosis groupings used in the hospital case-fatality indicator standardisation</b> |                                                                                               |
|----------------------------------------------------------------------------------------------------|-----------------------------------------------------------------------------------------------|
| <b>Elective admissions</b>                                                                         |                                                                                               |
| <b>Diagnosis Group and Description</b>                                                             |                                                                                               |
| 1                                                                                                  | A00-B99 - Chapter 1                                                                           |
| 2                                                                                                  | D00-D48 - Chapter 2 pt - In situ & benign neoplasms and others of uncertain/unknown behaviour |
| 3                                                                                                  | D50-D89 - Chapter 3                                                                           |
| 4                                                                                                  | E00-E90 - Chapter 4                                                                           |
| 5                                                                                                  | F00-F99 - Chapter 5                                                                           |
| 6                                                                                                  | G00-G99 - Chapter 6 - Remainder of chapter                                                    |
| 7                                                                                                  | G10-G13, G30-G32 - Rest of Other degenerative diseases (incl. Alzheimer's disease)            |
| 8                                                                                                  | G12 - Spinal muscular atrophy and related syndromes                                           |
| 9                                                                                                  | H00-H59 - Chapter 7                                                                           |
| 10                                                                                                 | H60-H95 - Chapter 8                                                                           |
| 11                                                                                                 | I00-I99 - Chapter 9 - Remainder of chapter                                                    |
| 12                                                                                                 | I00-I09 - Rheumatic heart disease                                                             |
| 13                                                                                                 | I21 - Acute myocardial infarction                                                             |
| 14                                                                                                 | I50 - Heart failure                                                                           |
| 15                                                                                                 | I60-I69 - Rest of Cerebrovascular diseases                                                    |
| 16                                                                                                 | I64 - Stroke not specified as haemorrhage or infarction                                       |
| 17                                                                                                 | I70-I79 - Rest of Diseases of arteries, arterioles & capillaries                              |
| 18                                                                                                 | I71 - Aortic aneurysm and dissection                                                          |
| 19                                                                                                 | I73 - Other peripheral vascular diseases                                                      |
| 20                                                                                                 | J00-J99 - Chapter 10 - Remainder of chapter                                                   |
| 21                                                                                                 | J10-J18 - Influenza & pneumonia                                                               |
| 22                                                                                                 | J20-J22 - Other acute lower respiratory infections                                            |
| 23                                                                                                 | K00-K93 - Chapter 11 - Remainder of chapter                                                   |
| 24                                                                                                 | K20-K31 - Diseases of oesophagus, stomach & duodenum                                          |
| 25                                                                                                 | K40-K46 - Hernia                                                                              |
| 26                                                                                                 | K70-K77 - Diseases of liver                                                                   |
| 27                                                                                                 | K80-K87 - Rest of Disorders of gallbladder, biliary tract & pancreas                          |
| 28                                                                                                 | K80 - Cholelithiasis                                                                          |

| <b>Table 2.1: Diagnosis groupings used in the hospital case-fatality indicator standardisation</b> |                                                                                                |
|----------------------------------------------------------------------------------------------------|------------------------------------------------------------------------------------------------|
| <b>Elective admissions</b>                                                                         |                                                                                                |
| <b>Diagnosis Group and Description</b>                                                             |                                                                                                |
| 29                                                                                                 | L00-L99 - Chapter 12 - Remainder of chapter                                                    |
| 30                                                                                                 | M00-M99 - Chapter 13 - Remainder of chapter                                                    |
| 31                                                                                                 | M16 - Coxarthrosis [arthrosis of hip]                                                          |
| 32                                                                                                 | N00-N99 - Chapter 14 - Remainder of chapter                                                    |
| 33                                                                                                 | N17-N19 - Renal failure                                                                        |
| 34                                                                                                 | N40-N51 - Diseases of male genital organs                                                      |
| 35                                                                                                 | N80-N98 – Non-inflammatory disorders of female genital tract                                   |
| 36                                                                                                 | O00-O99 - Chapter 15                                                                           |
| 37                                                                                                 | P00-P96 - Chapter 16                                                                           |
| 38                                                                                                 | Q00-Q99 - Chapter 17                                                                           |
| 39                                                                                                 | R00-R99 - Chapter 18 - Remainder of chapter                                                    |
| 40                                                                                                 | R10-R19 - Rest of Symptoms & signs inv. the digestive system & abdomen                         |
| 41                                                                                                 | R13 - Dysphagia                                                                                |
| 42                                                                                                 | R30-R39 - Symptoms & signs involving the urinary system                                        |
| 43                                                                                                 | R69-R69 - Unknown & unspecified causes of morbidity                                            |
| 44                                                                                                 | S00-T98 - Chapter 19                                                                           |
| 45                                                                                                 | Z00-Z99 - Chapter 21 - Remainder of chapter                                                    |
| 46                                                                                                 | Z00-Z13 - Rest of Persons encountering health services for examination                         |
| 47                                                                                                 | Z08 - Follow-up examination after treatment for malignant neoplasm                             |
| 48                                                                                                 | Z40-Z54 - Rest of Persons encountering health services for specific procedures and health care |
| 49                                                                                                 | Z46 - Fitting and adjustment of other devices                                                  |
| 50                                                                                                 | Z51 - Other medical care                                                                       |
| 51                                                                                                 | Z70-Z76 - Persons encountering health services in other circumstances                          |
|                                                                                                    |                                                                                                |
|                                                                                                    |                                                                                                |
|                                                                                                    |                                                                                                |
|                                                                                                    |                                                                                                |
|                                                                                                    |                                                                                                |

| <b>Table 2.1 (cont.): Diagnosis groupings used in the hospital case-fatality indicator standardisation</b> |                                                                                               |                                        |                                                                               |
|------------------------------------------------------------------------------------------------------------|-----------------------------------------------------------------------------------------------|----------------------------------------|-------------------------------------------------------------------------------|
| <b>Non-elective admissions</b>                                                                             |                                                                                               | <b>Non-elective admissions</b>         |                                                                               |
| <b>Diagnosis Group and Description</b>                                                                     |                                                                                               | <b>Diagnosis Group and Description</b> |                                                                               |
| 1                                                                                                          | A00-B99 - Chapter 1 - Remainder of chapter                                                    | 29                                     | G45 - Transient cerebral ischaemic attacks and related syndromes              |
| 2                                                                                                          | A00-A09 - Rest of Intestinal infectious diseases                                              | 30                                     | G50-G73, G90-G99 - Rest of Other diseases & disorders of the nervous system   |
| 3                                                                                                          | A04 - Other bacterial intestinal infections                                                   | 31                                     | G93 - Other disorders of brain                                                |
| 4                                                                                                          | A20-A49 - Rest of Certain bacterial diseases                                                  | 32                                     | G80-G83 - Cerebral palsy & other paralytic syndromes                          |
| 5                                                                                                          | A39 - Meningococcal infection                                                                 | 33                                     | H00-H59 - Chapter 7 -                                                         |
| 6                                                                                                          | B00-B09 - Viral infections characterized by skin & mucous membrane lesions                    | 34                                     | H60-H95 - Chapter 8 -                                                         |
| 7                                                                                                          | D00-D48 - Chapter 2 pt - In situ & benign neoplasms and others of uncertain/unknown behaviour | 35                                     | I00-I99 - Chapter 9 - Remainder of chapter                                    |
| 8                                                                                                          | D50-D89 - Chapter 3 - Remainder of chapter                                                    | 36                                     | I10-I15 - Rest of Hypertensive diseases                                       |
| 9                                                                                                          | D50 - Iron deficiency anaemia                                                                 | 37                                     | I10 - Essential (primary) hypertension                                        |
| 10                                                                                                         | D65-D89 - Diseases of the blood and blood-forming organs                                      | 38                                     | I11 - Hypertensive heart disease                                              |
| 11                                                                                                         | E00-E90 - Chapter 4 - Remainder of chapter                                                    | 39                                     | I12 - Hypertensive renal disease                                              |
| 12                                                                                                         | E16 - Other disorders of pancreatic internal secretion                                        | 40                                     | I20 - Angina pectoris                                                         |
| 13                                                                                                         | E86 - Volume depletion                                                                        | 41                                     | I21 - Acute myocardial infarction                                             |
| 14                                                                                                         | E87 - Other disorders of fluid electrolyte and acid-base balance                              | 42                                     | I22 - Subsequent myocardial infarction                                        |
| 15                                                                                                         | F00-F99 - Chapter 5 - Remainder of chapter                                                    | 43                                     | I23 - Certain current complication follow acute myocardial infarction         |
| 16                                                                                                         | F00-F03 - Dementia                                                                            | 44                                     | I24 - Other acute ischaemic heart diseases                                    |
| 17                                                                                                         | F20-F29 - Schizophrenia, schizotypal and delusional disorders                                 | 45                                     | I25 - Chronic ischaemic heart disease                                         |
| 18                                                                                                         | F30-F39 - Mood [affective] disorders                                                          | 46                                     | I26-I28 - Rest of Pulmonary heart disease & diseases of pulmonary circulation |
| 19                                                                                                         | F40-F69 - Neurotic behavioural & personality disorders                                        | 47                                     | I27 - Other pulmonary heart diseases                                          |
| 20                                                                                                         | G00-G99 - Chapter 6 - Remainder of chapter                                                    | 48                                     | I30-I52 - Rest of Other forms of heart disease                                |
| 21                                                                                                         | G00-G09 - Inflammatory diseases of the central nervous system                                 | 49                                     | I31 - Other diseases of pericardium                                           |
| 22                                                                                                         | G10-G13, G30-G32 - Rest of Other degenerative diseases (excl Alzheimer's disease)             | 50                                     | I33 - Acute and subacute endocarditis                                         |
| 23                                                                                                         | G12 - Spinal muscular atrophy and related syndromes                                           | 51                                     | I42 - Cardiomyopathy                                                          |
| 24                                                                                                         | G30 - Alzheimer's disease                                                                     | 52                                     | I44 - Atrioventricular and left bundle-branch block                           |
| 25                                                                                                         | G35-G37 - Demyelinating diseases (incl. Multiple Sclerosis) of the central nervous system     | 53                                     | I45 - Other conduction disorders                                              |
| 26                                                                                                         | G40-G47 - Rest of Epilepsy migraine & other episodic disorders                                | 54                                     | I46 - Cardiac arrest                                                          |
| 27                                                                                                         | G40 - Epilepsy                                                                                | 55                                     | I47 - Paroxysmal tachycardia                                                  |
| 28                                                                                                         | G41 - Status epilepticus                                                                      |                                        |                                                                               |

**Table 2.1 (cont.): Diagnosis groupings used in the hospital case-fatality indicator standardisation**

| Non-elective admissions         |                                                                           | Non-elective admissions         |                                                              |
|---------------------------------|---------------------------------------------------------------------------|---------------------------------|--------------------------------------------------------------|
| Diagnosis Group and Description |                                                                           | Diagnosis Group and Description |                                                              |
| 56                              | I48 - Atrial fibrillation and flutter                                     | 84                              | J40-J47 - Rest of Chronic lower respiratory diseases         |
| 57                              | I49 - Other cardiac arrhythmias                                           | 85                              | J43 - Emphysema                                              |
| 58                              | I50 - Heart failure                                                       | 86                              | J44 - Other chronic obstructive pulmonary disease            |
| 59                              | I60-I69 - Rest of Cerebrovascular diseases                                | 87                              | J45 - Asthma                                                 |
| 60                              | I60 - Subarachnoid haemorrhage                                            | 88                              | J60-J70 - Lung diseases due to external agents               |
| 61                              | I61 - Intracerebral haemorrhage                                           | 89                              | J80-J99 - Rest of Other diseases of the respiratory system   |
| 62                              | I63 - Cerebral infarction                                                 | 90                              | J81 - Pulmonary oedema                                       |
| 63                              | I64 - Stroke not specified as haemorrhage or infarction                   | 91                              | J84 - Other interstitial pulmonary diseases                  |
| 64                              | I67 - Other cerebrovascular diseases                                      | 92                              | J90 - Pleural effusion not elsewhere classified              |
| 65                              | I70-I79 - Rest of Diseases of arteries, arterioles & capillaries          | 93                              | J93 - Pneumothorax                                           |
| 66                              | I70 - Atherosclerosis                                                     | 94                              | J96 - Respiratory failure not elsewhere classified           |
| 67                              | I71 - Aortic aneurysm and dissection                                      | 95                              | J98 - Other respiratory disorders                            |
| 68                              | I72 - Other aneurysm                                                      | 96                              | K00-K93 - Chapter 11 - Remainder of chapter                  |
| 69                              | I73 - Other peripheral vascular diseases                                  | 97                              | K20-K31 - Rest of Diseases of oesophagus, stomach & duodenum |
| 70                              | I74 - Arterial embolism and thrombosis                                    | 98                              | K21 - Gastro-oesophageal reflux disease                      |
| 71                              | I77 - Other disorders of arteries and arterioles                          | 99                              | K22 - Other diseases of oesophagus                           |
| 72                              | I80-I89 - Rest of Diseases of veins & lymphatic system nec                | 100                             | K25 - Gastric ulcer                                          |
| 73                              | I80 - Phlebitis and thrombophlebitis                                      | 101                             | K26 - Duodenal ulcer                                         |
| 74                              | I85 - Oesophageal varices                                                 | 102                             | K27 - Peptic ulcer site unspecified                          |
| 75                              | I95-I99 - Rest of Other & unspecified disorders of the circulatory system | 103                             | K29 - Gastritis and duodenitis                               |
| 76                              | I95 - Hypotension                                                         | 104                             | K35-K38 - Diseases of appendix                               |
| 77                              | I99 - Other and unspecified disorders of circulatory system               | 105                             | K40-K46 - Rest of Hernia                                     |
| 78                              | J00-J99 - Chapter 10 - Remainder of chapter                               | 106                             | K40 - Inguinal hernia                                        |
| 79                              | J00-J06 - Acute upper respiratory infections                              | 107                             | K41 - Femoral hernia                                         |
| 80                              | J10-J18 - Rest of Influenza & pneumonia                                   | 108                             | K50-K52 - Non-infective enteritis & colitis                  |
| 81                              | J13 - Pneumonia due to Streptococcus pneumoniae                           | 109                             | K55-K63 - Rest of Other diseases of intestines               |
| 82                              | J15 - Bacterial pneumonia not elsewhere classified                        | 110                             | K55 - Vascular disorders of intestine                        |
| 83                              | J20-J22 - Other acute lower respiratory infections                        |                                 |                                                              |

**Table 2.1 (cont.): Diagnosis groupings used in the hospital case-fatality indicator standardisation**

| Non-elective admissions         |                                                                      | Non-elective admissions         |                                                                                   |
|---------------------------------|----------------------------------------------------------------------|---------------------------------|-----------------------------------------------------------------------------------|
| Diagnosis Group and Description |                                                                      | Diagnosis Group and Description |                                                                                   |
| 111                             | K56 - Paralytic ileus and intestinal obstruction without hernia      | 139                             | M06 - Other rheumatoid arthritis                                                  |
| 112                             | K57 - Diverticular disease of intestine                              | 140                             | M30-M36 - Systemic connective tissue disorders                                    |
| 113                             | K59 - Other functional intestinal disorders                          | 141                             | M60-M79 - Soft tissue disorders                                                   |
| 114                             | K62 - Other diseases of anus and rectum                              | 142                             | M80-M94 - Rest of Osteopathies and chondropathies                                 |
| 115                             | K63 - Other diseases of intestine                                    | 143                             | M80 - Osteoporosis with pathological fracture                                     |
| 116                             | K65-K67 - Rest of Diseases of peritoneum                             | 144                             | N00-N99 - Chapter 14 - Remainder of chapter                                       |
| 117                             | K65 - Peritonitis                                                    | 145                             | N17 - Acute renal failure                                                         |
| 118                             | K66 - Other disorders of peritoneum                                  | 146                             | N18 - Chronic renal failure                                                       |
| 119                             | K70-K77 - Rest of Diseases of liver                                  | 147                             | N19 - Unspecified renal failure                                                   |
| 120                             | K70 - Alcoholic liver disease                                        | 148                             | N30-N39 - Other diseases of the urinary system                                    |
| 121                             | K72 - Hepatic failure not elsewhere classified                       | 149                             | N40-N51 - Diseases of male genital organs                                         |
| 122                             | K74 - Fibrosis and cirrhosis of liver                                | 150                             | N80-N98 - Non-inflammatory disorders of female genital tract                      |
| 123                             | K76 - Other diseases of liver                                        | 151                             | O00-O99 - Chapter 15 -                                                            |
| 124                             | K80-K87 - Rest of Disorders of gallbladder, biliary tract & pancreas | 152                             | P00-P96 - Chapter 16 - Remainder of chapter                                       |
| 125                             | K80 - Cholelithiasis                                                 | 153                             | P07 - Disorders related to short gestation and low birth weight                   |
| 126                             | K81 - Cholecystitis                                                  | 154                             | Q00-Q99 - Chapter 17 -                                                            |
| 127                             | K83 - Other diseases of biliary tract                                | 155                             | R00-R99 - Chapter 18 - Remainder of chapter                                       |
| 128                             | K85 - Acute pancreatitis                                             | 156                             | R00-R09 - Rest of Symptoms & signs inv. the circulatory/respiratory system        |
| 129                             | K86 - Other diseases of pancreas                                     | 157                             | R00 - Abnormalities of heart beat                                                 |
| 130                             | K90-K93 - Rest of Other diseases of the digestive system             | 158                             | R02 - Gangrene not elsewhere classified                                           |
| 131                             | K91 - Postprocedural disorders of digestive system NEC               | 159                             | R04 - Haemorrhage from respiratory passages                                       |
| 132                             | L00-L99 - Chapter 12 - Remainder of chapter                          | 160                             | R05 - Cough                                                                       |
| 133                             | L02 - Cutaneous abscess furuncle and carbuncle                       | 161                             | R06 - Abnormalities of breathing                                                  |
| 134                             | L03 - Cellulitis                                                     | 162                             | R07 - Pain in throat and chest                                                    |
| 135                             | L89 - Decubitus ulcer                                                | 163                             | R09 - Other symptoms and signs involving the circulatory, and respiratory systems |
| 136                             | L97 - Ulcer of lower limb not elsewhere classified                   | 164                             | R10-R19 - Rest of Symptoms & signs involving the digestive system & abdomen       |
| 137                             | M00-M99 - Chapter 13 - Remainder of chapter                          | 165                             | R10 - Abdominal and pelvic pain                                                   |
| 138                             | M00 - Pyogenic arthritis                                             |                                 |                                                                                   |

| <b>Table 2.1 (cont.): Diagnosis groupings used in the hospital case-fatality indicator standardisation</b> |                                                                        |                                        |                                                                              |
|------------------------------------------------------------------------------------------------------------|------------------------------------------------------------------------|----------------------------------------|------------------------------------------------------------------------------|
| <b>Non-elective admissions</b>                                                                             |                                                                        | <b>Non-elective admissions</b>         |                                                                              |
| <b>Diagnosis Group and Description</b>                                                                     |                                                                        | <b>Diagnosis Group and Description</b> |                                                                              |
| 166                                                                                                        | R13 - Dysphagia                                                        | 194                                    | S20-S29 - Rest of Injuries to the thorax                                     |
| 167                                                                                                        | R17 - Unspecified jaundice                                             | 195                                    | S27 - Injury of other and unspecified intrathoracic organs                   |
| 168                                                                                                        | R18 - Ascites                                                          | 196                                    | S30-S39 - Rest of Injuries to the abdomen. lower back, lumbar spine & pelvis |
| 169                                                                                                        | R19 - Other symptoms & signs involving digestive system and abdomen.   | 197                                    | S36 - Injury of intra-abdominal organs                                       |
| 170                                                                                                        | R20-R23 - Symptoms & signs inv. the skin & subcutaneous tissue         | 198                                    | S40-S49 - Injuries to the shoulder & upper arm                               |
| 171                                                                                                        | R25-R29 - Symptoms & signs inv. the nervous& musculoskeletal system    | 199                                    | S50-S59 - Injuries to the elbow & forearm                                    |
| 172                                                                                                        | R30-R39 - Symptoms & signs involving the urinary system                | 200                                    | S70-S79 - Rest of Injuries to the hip & thigh                                |
| 173                                                                                                        | R40-R46 - Rest of Symptoms & signs inv. Cognition, perception etc.     | 201                                    | S79 - Other and specified injuries of hip and thigh                          |
| 174                                                                                                        | R40 – Somnolence, stupor and coma                                      | 202                                    | S80-S89 - Injuries to the knee & lower leg                                   |
| 175                                                                                                        | R41 – Other symptoms & signs involve. cognitive function and awareness | 203                                    | T08-T14 - Injuries to unspecified part of trunk limb or body region          |
| 176                                                                                                        | R42 - Dizziness and giddiness                                          | 204                                    | T20-T32 - Burns and corrosions                                               |
| 177                                                                                                        | R50-R68 - Rest of General symptoms & signs                             | 205                                    | T36-T50 - Rest of Poisonings by drugs medicaments & biological substances    |
| 178                                                                                                        | R51 - Headache                                                         | 206                                    | T40 - Poisoning by narcotics and psychodysleptics [hallucinogens]            |
| 179                                                                                                        | R53 - Malaise and fatigue                                              | 207                                    | T51-T65 - Toxic effects of substances chiefly non-medicinal as to source     |
| 180                                                                                                        | R55 - Syncope and collapse                                             | 208                                    | T66-T78 - Rest of Other and unspecified effects of external causes           |
| 181                                                                                                        | R56 - Convulsions not elsewhere classified                             | 209                                    | T68 - Hypothermia                                                            |
| 182                                                                                                        | R57 - Shock not elsewhere classified                                   | 210                                    | T80-T88 - Rest of Complications of surgical & medical care nec.              |
| 183                                                                                                        | R63 - Symptoms and signs concerning food and fluid intake              | 211                                    | T82 - Comps of cardiac & vasc. prosthetic devices, implants & grafts         |
| 184                                                                                                        | R68 - Other general symptoms and signs                                 | 212                                    | T83 - Comps of genitourinary prosthetic devices, implants & grafts           |
| 185                                                                                                        | R69-R69 - Unknown & unspecified causes of morbidity                    | 213                                    | T84 - Comps of internal orthopaedic prosthetic devices implants & grafts     |
| 186                                                                                                        | S00-T98 - Chapter 19 - Remainder of chapter                            | 214                                    | T85 - Comps other internal prosthetic devices implants &grafts               |
| 187                                                                                                        | S00-S09 - Rest of Injuries to the head                                 | 215                                    | Z00-Z99 - Chapter 21 - Remainder of chapter                                  |
| 188                                                                                                        | S00 - Superficial injury of head                                       | 216                                    | Z00-Z13 - Rest of Persons encountering health services for exam.             |
| 189                                                                                                        | S01 - Open wound of head                                               | 217                                    | Z03 - Med observ and evaluation for suspected diseases and conditions        |
| 190                                                                                                        | S02 - Fracture of skull and facial bones                               | 218                                    | Z51 - Other medical care                                                     |
| 191                                                                                                        | S06 - Intracranial injury                                              | 219                                    | Z70-Z76 - Persons encountering health services in other circumstances        |
| 192                                                                                                        | S09 - Other and unspecified injuries of head                           |                                        |                                                                              |
| 193                                                                                                        | S10-S19 – Injuries to the neck                                         |                                        |                                                                              |





**Table 2.2: Deaths within 30 days of admission to hospital, per 100,000 patients by age and sex**

(standardised for method of admission and diagnosis at chapter/sub-chapter/3 digit ICD10 code), including deaths in hospital and after discharge, excluding spells with cancer coded anywhere. (Standardised to 2001-2)

| <i>England</i> |       |       |       |        |        |        |        |        |         |        |
|----------------|-------|-------|-------|--------|--------|--------|--------|--------|---------|--------|
|                |       |       |       |        |        |        |        |        |         |        |
| Female         | 0     | 1-4   | 5-9   | 10-14  | 15-19  | 20-24  | 25-29  | 30-34  | 35-39   | 40-44  |
|                |       |       |       |        |        |        |        |        |         |        |
| 1998-9         | 592.7 | 127.3 | 66.0  | 84.5   | 69.9   | 35.6   | 37.7   | 59.6   | 105.0   | 225.2  |
| 1999-2000      | 549.6 | 124.1 | 63.7  | 101.4  | 53.9   | 41.4   | 41.2   | 53.7   | 104.4   | 234.2  |
| 2000-1         | 498.6 | 102.7 | 70.1  | 83.3   | 60.3   | 37.5   | 40.0   | 59.5   | 106.6   | 206.4  |
| 2001-2         | 514.6 | 80.5  | 76.3  | 67.0   | 55.5   | 36.3   | 33.7   | 50.2   | 106.7   | 222.2  |
| 2002-3         | 480.4 | 104.2 | 43.6  | 76.8   | 52.2   | 38.4   | 40.6   | 54.2   | 103.5   | 216.4  |
|                |       |       |       |        |        |        |        |        |         |        |
| Female         | 45-49 | 50-54 | 55-59 | 60-64  | 65-69  | 70-74  | 75-79  | 80-84  | 85+     | All    |
|                |       |       |       |        |        |        |        |        |         |        |
| 1998-9         | 389.1 | 515.4 | 758.2 | 1224.6 | 1936.4 | 3092.9 | 4559.6 | 6593.5 | 11298.9 | 1792.7 |
| 1999-2000      | 380.5 | 482.3 | 707.6 | 1162.9 | 1820.5 | 2908.7 | 4412.2 | 6465.6 | 11076.7 | 1737.1 |
| 2000-1         | 365.5 | 472.2 | 672.8 | 1084.4 | 1710.5 | 2706.0 | 4175.6 | 6184.2 | 10626.4 | 1652.7 |
| 2001-2         | 349.2 | 473.5 | 685.2 | 1062.5 | 1633.4 | 2571.4 | 4062.6 | 6044.8 | 10862.5 | 1638.9 |
| 2002-3         | 359.4 | 468.4 | 649.0 | 1009.1 | 1574.6 | 2520.3 | 3974.7 | 5961.3 | 10879.2 | 1620.8 |
