# Supplementary material
Source: PubMed Central journal article supplement (PMC558459)
Supplement: bmj_330_7506_1486__13.pdf [file bmj_330_7506_1486__13.pdf]

## **5) Avoidable deaths**

**5.1 Numerator:** Deaths from the following causes, classified by underlying cause of death, in the specified age groups registered in the specified calendar year(s). Years 1993-2000 use ICD-9, and years 2001-2 use ICD-10. Data based on ICD-9 are *NOT* adjusted for equivalence to ICD-10. Source: DH Mortality Extract 1993-2002, ONS.

**Table 5.1: Causes of death considered amenable to healthcare<sup>16</sup>**

| <b>Table 5.1: Causes of death considered amenable to healthcare<sup>16</sup></b> |                                                                  |            |                                    |                                  |
|----------------------------------------------------------------------------------|------------------------------------------------------------------|------------|------------------------------------|----------------------------------|
| <b>Name of Disease Group</b>                                                     |                                                                  | <b>Age</b> | <b>ICD-9 Codes<br/>(1993-2000)</b> | <b>ICD-10 Codes<br/>(2001-2)</b> |
| 1                                                                                | Intestinal infections                                            | 0-14 yrs   | 001-009                            | A00-A09                          |
| 2                                                                                | Tuberculosis                                                     | 0-74 yrs   | 010-018, 137                       | A15-A19, B90                     |
| 3                                                                                | Other infectious diseases (diphtheria, tetanus, poliomyelitis)   | 0-74 yrs   | 032, 037, 045                      | A36, A35, A80                    |
| 4                                                                                | Whooping cough                                                   | 0-14 yrs   | 033                                | A37                              |
| 5                                                                                | Septicaemia                                                      | 0-74 yrs   | 038                                | A40-A41                          |
| 6                                                                                | Measles                                                          | 1-14 yrs   | 055                                | B05                              |
| 7                                                                                | Malignant neoplasm of colon and rectum                           | 0-74 yrs   | 153-154                            | C18-C21                          |
| 8                                                                                | Malignant neoplasm of skin                                       | 0-74 yrs   | 173                                | C44                              |
| 9                                                                                | Malignant neoplasm of female breast                              | 0-74 yrs   | 174                                | C50                              |
| 10                                                                               | Malignant neoplasm of cervix uteri                               | 0-74 yrs   | 180                                | C53                              |
| 11                                                                               | Malignant neoplasm of cervix uteri and body of the uterus        | 0-44 yrs   | 179, 182                           | C54-C55                          |
| 12                                                                               | Malignant neoplasm of testis                                     | 0-74 yrs   | 186                                | C62                              |
| 13                                                                               | Hodgkin's disease                                                | 0-74 yrs   | 201                                | C81                              |
| 14                                                                               | Leukaemia                                                        | 0-44 yrs   | 204-208                            | C91-C95                          |
| 15                                                                               | Diseases of the thyroid                                          | 0-74 yrs   | 240-246                            | E00-E07                          |
| 16                                                                               | Diabetes mellitus                                                | 0-49 yrs   | 250                                | E10-E14                          |
| 17                                                                               | Epilepsy                                                         | 0-74 yrs   | 345                                | G40-G41                          |
| 18                                                                               | Chronic rheumatic heart disease                                  | 0-74 yrs   | 393-398                            | I05-I09                          |
| 19                                                                               | Hypertensive disease                                             | 0-74 yrs   | 401-405                            | I10-I13, I15                     |
| 20                                                                               | Ischaemic Heart Disease                                          | 0-74 yrs   | 410-414                            | I20-I25                          |
| 21                                                                               | Cerebrovascular disease                                          | 0-74 yrs   | 430-438                            | I60-I69                          |
| 22                                                                               | All respiratory diseases (excl. pneumonia, influenza and asthma) | 1-14 yrs   | 460-479, 488-492,<br>494-519       | J00-J09, J20-J44,<br>J47-J99     |

**Table 5.1: Causes of death considered amenable to healthcare<sup>16</sup>**

| <b>Name of Disease Group</b>                                  | <b>Age</b> | <b>ICD-9 Codes<br/>(1993-2000)</b> | <b>ICD-10 Codes<br/>(2001-2)</b> |
|---------------------------------------------------------------|------------|------------------------------------|----------------------------------|
| 23 Influenza                                                  | 0-74 yrs   | 487                                | J10-J11                          |
| 24 Pneumonia                                                  | 0-74 yrs   | 480-486                            | J12-J18                          |
| 25 Asthma                                                     | 0-44 yrs   | 493                                | J45-J46                          |
| 26 Peptic ulcer                                               | 0-74 yrs   | 531-533                            | K25-K27                          |
| 27 Appendicitis                                               | 0-74 yrs   | 540-543                            | K35-K38                          |
| 28 Abdominal hernia                                           | 0-74 yrs   | 550-553                            | K40-K46                          |
| 29 Cholelithiasis & cholecystitis                             | 0-74 yrs   | 574-575.1                          | K80-K81                          |
| 30 Nephritis and nephrosis                                    | 0-74 yrs   | 580-589                            | N00-N07, N17-<br>N19, N25-N27    |
| 31 Benign prostatic hyperplasia                               | 0-74 yrs   | 600                                | N40                              |
| 32 Maternal deaths                                            | All Ages   | 630-676                            | O00-O99                          |
| 33 Congenital cardiovascular anomalies                        | 0-74 yrs   | 745-747                            | Q20-Q28                          |
| 34 Perinatal deaths (all causes excl. stillbirths)            | 0-6 days   | All                                | All                              |
| 35 Misadventures to patients during surgical and medical care | 0-74 yrs   | E870-E876, E878-<br>E879           | Y60-Y69, Y83-<br>Y84             |

**5.2 Denominator:** Mid-year population estimates for ages under 75 years for the specified year(s). Source: 1992-2000 revised mid-year population estimates (released 13/02/2003), ONS; 2001 revised mid-year population estimates (released 4/11/2003), ONS; 2002 revised mid-year population estimates (released 27/01/2004), ONS.

Rates are directly age standardised using the European Standard Population. Source: Waterhouse J et al (eds). Cancer incidence in five continents. Lyons: IARC, 1976 (Vol. 3, p456).
