# Supplementary material
Source: PubMed Central journal article supplement (PMC558459)
Supplement: bmj_330_7506_1486__14.pdf [file bmj_330_7506_1486__14.pdf]

## **6) Ischaemic heart disease deaths**

**6.1 Numerator:** Deaths from ischaemic heart disease, classified by underlying cause of death (ICD-9 410-414, ICD-10 I20-I25), for ages under 75 years registered in the specified calendar year(s). Years 1993-2000 use ICD-9, and years 2001-2 use ICD-10. Data based on ICD-9 are *NOT* adjusted for equivalence to ICD-10. Source: DH Mortality Extract 1993-2002, ONS.

**6.2 Denominator:** Mid-year population estimates for ages under 75 years for the specified year(s). Source: 1992-2000 revised mid-year population estimates (released 13/02/2003), ONS; 2001 revised mid-year population estimates (released 4/11/2003), ONS; 2002 revised mid-year population estimates (released 27/01/2004), ONS.

Rates are directly age standardised using the European Standard Population. Source: Waterhouse J et al (eds). Cancer incidence in five continents. Lyons: IARC, 1976 (Vol. 3, p456).
